# Supplementary material for: Integrating co-expression network analysis and machine learning to reveal the regulatory landscape of GPD genes in Chlamydomonas reinhardtii under salinity stress
Source: PeerJ journal article supplement (doi:10.7717/peerj.21060), 2026-04-14
Supplement: Supplemental_Data_File1.pdf [file Supplemental_Data_File1.pdf]

# **Integrating co-expression network analysis and machine learning to reveal the regulatory landscape of *GPD* genes in *Chlamydomonas reinhardtii* under salinity stress**

Jorge A. Tzec-Interián<sup>1</sup>, Santy Peraza-Echeverría<sup>1</sup>, Virginia Aurora Herrera-Valencia<sup>1,\*</sup> and Elsa B. Góngora-Castillo<sup>2\*</sup>

<sup>1</sup> Unidad de Biotecnología, Centro de Investigación Científica de Yucatán, Mérida, Yucatán, México

<sup>2</sup> Secihti-Departamento de Recursos del Mar, Centro de Investigación y de Estudios Avanzados del Instituto Politécnico Nacional, Mérida, Yucatán. México

Corresponding Author:

Elsa B. Góngora-Castillo<sup>2</sup>

Email address: [elsa.gongora@cinvestav.mx](mailto:elsa.gongora@cinvestav.mx)

Virginia Aurora Herrera-Valencia<sup>1</sup>

Email address: [vicky@cicy.mx](mailto:vicky@cicy.mx)

**Table S1.** Number of reads processed of *C. reinhardtii* transcriptome under NaCl 200 mM and reads mapped to *C. reinhardtii* genome.

| Time | Sample | Total processed reads | Reads aligned (%) | Reads assigned (%) |
|------|--------|-----------------------|-------------------|--------------------|
| 0 h  | 0h_1   | 64,565,134            | 92.8              | 85                 |
|      | 0h_2   | 57,051,752            | 91.5              | 83.2               |
|      | 0h_3   | 48,720,822            | 93                | 84.6               |
| 2 h  | 2h_1   | 58,833,816            | 92.5              | 88.2               |
|      | 2h_2   | 74,599,804            | 92.               | 83                 |
|      | 2h_3   | 54,934,298            | 91.5              | 85.4               |
| 4 h  | 4h_1   | 62,276,286            | 92.3              | 85.5               |
|      | 4h_2   | 67,923,934            | 91.8              | 84.9               |
|      | 4h_3   | 66,830,934            | 91.6              | 82.7               |
| 8 h  | 8h_1   | 58,110,462            | 92.7              | 84.5               |
|      | 8h_2   | 60,749,986            | 92                | 84.1               |
|      | 8h_3   | 47,640,920            | 92.2              | 84                 |
| 12 h | 12h_1  | 57,397,562            | 91.7              | 85.2               |
|      | 12h_2  | 54,520,628            | 91.3              | 85                 |
|      | 12h_3  | 66,026,050            | 91.4              | 85                 |
| 24 h | 24h_1  | 52,497,330            | 90.3              | 84.7               |
|      | 24h_2  | 57,328,362            | 89.3              | 83.9               |
|      | 24h_3  | 55,270,834            | 89.2              | 84.1               |
| 48 h | 48h_1  | 60,818,302            | 90.7              | 84.5               |
|      | 48h_2  | 63,372,090            | 87.5              | 81.6               |
|      | 48h_3  | 60,260,368            | 88.7              | 82.6               |
| 72 h | 72h_1  | 54,017,246            | 79.7              | 76.6               |
|      | 72h_2  | 53,570,258            | 84.6              | 80                 |
|      | 72h_3  | 59,168,744            | 86.4              | 81                 |

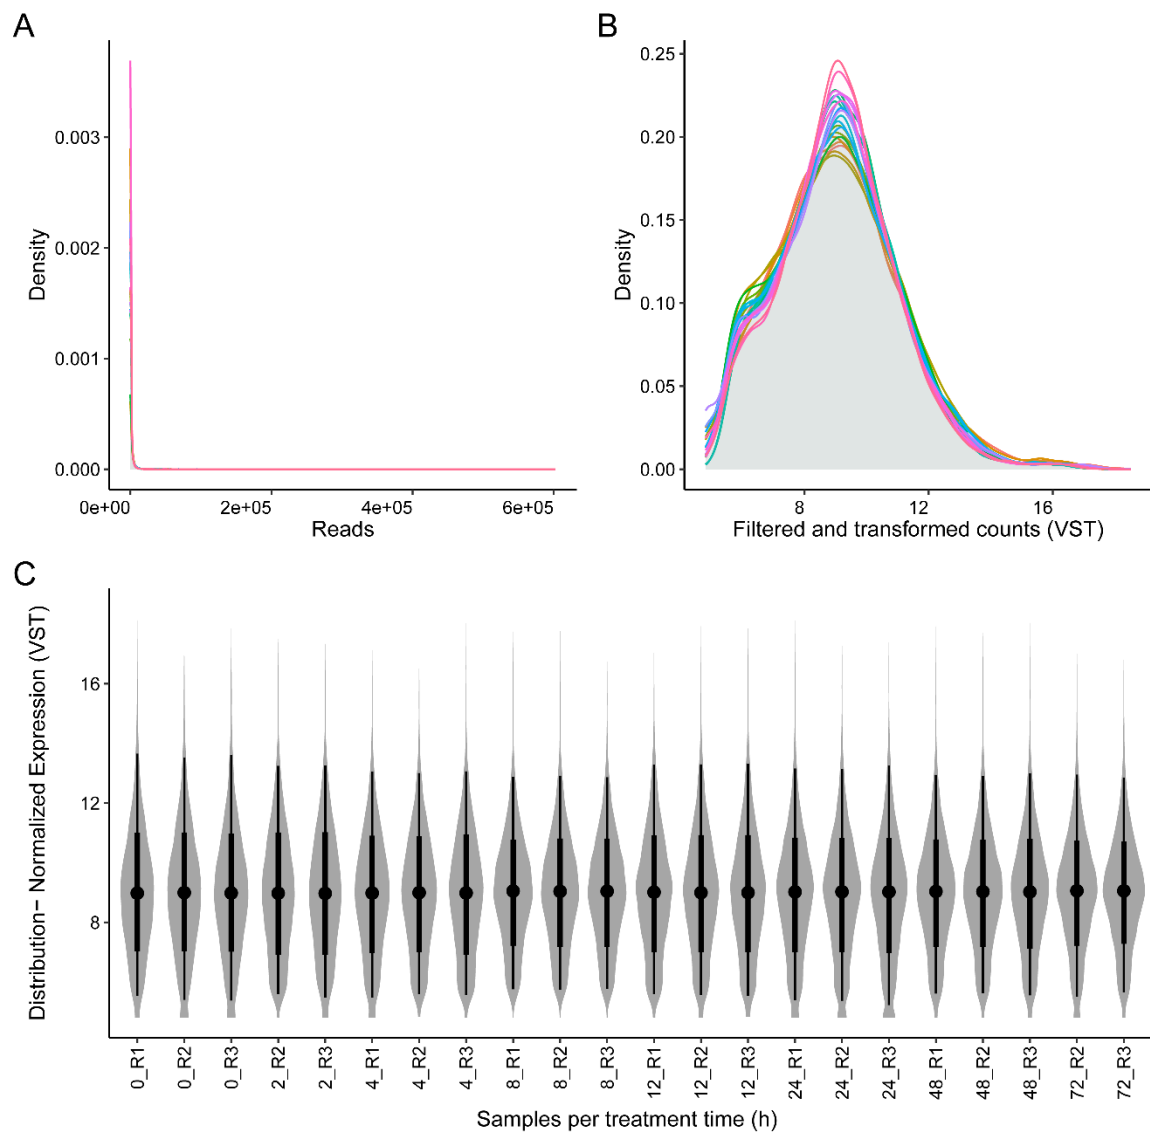

**Figure S1.** Density of gene expression data before and after filtering and normalization with the variance stabilization transformation (VST) function. (A) Density of expression values from raw counts for each of the 24 samples and 17,741 genes analyzed. (B) Density of expression values filtered and normalized with VST for 22 samples and 15,323 genes. (C) Data distribution of the 22 samples after filtering and normalization with the VST function. 0\_R1 refers to control without NaCl treatment (0 h), replicate 1.

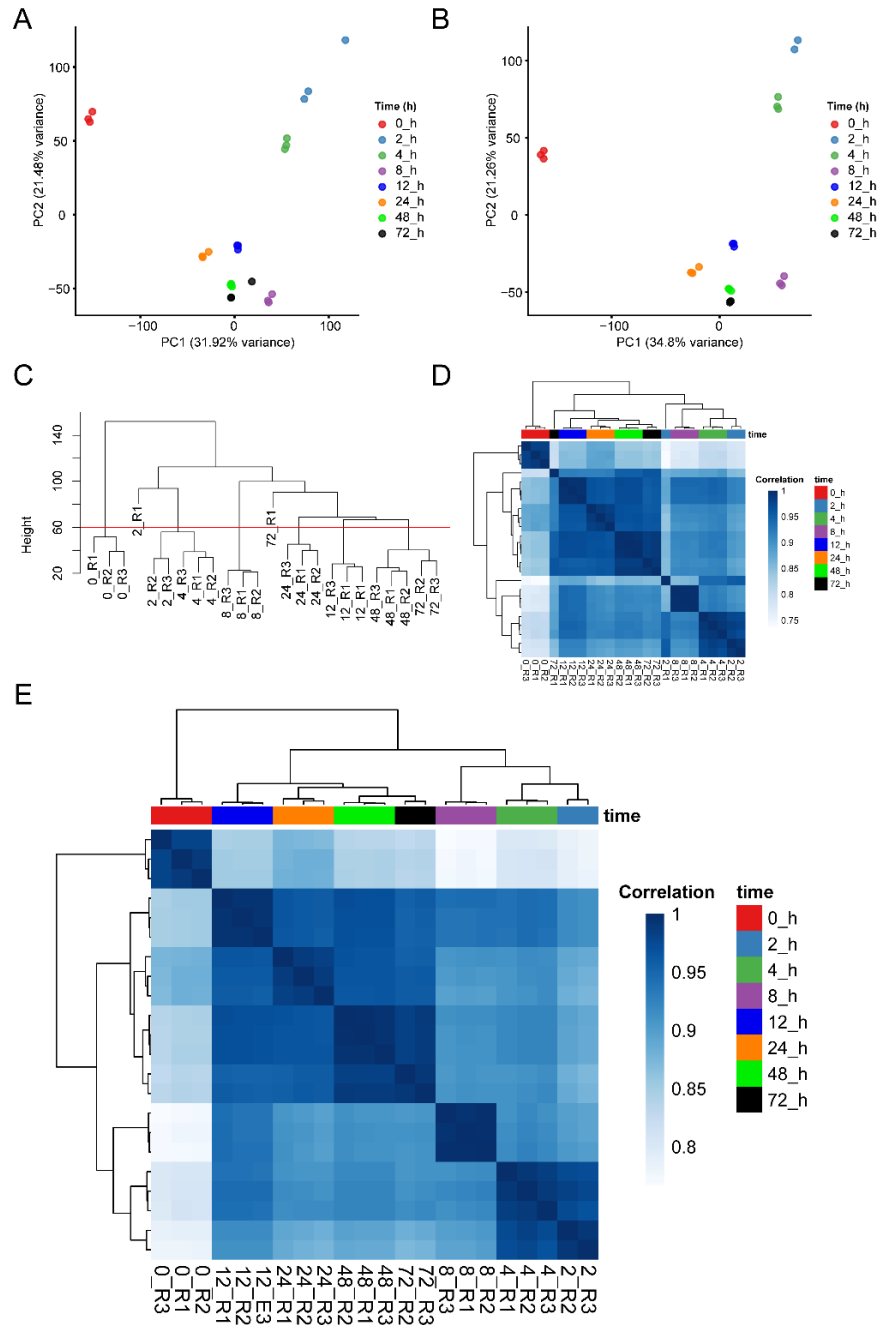

**Figure S2.** Sample outlier detection. (A) Principal component analysis (PCA) of the 24 original samples (0–72 h) on VST-normalized expression values, showing overall grouping by time point prior to outlier removal. (B) PCA of the dataset after removing two outlier samples (2 h replicate 1 and 72 h replicate 1), showing improved within-group consistency. (C) Hierarchical clustering of the 24 samples using Euclidean distances and the average linkage method on VST-normalized expression values. The red line indicates the height threshold used to define outliers. (D) Pearson pairwise correlation heatmap for all 24 samples before outlier removal, highlighting reduced correlation of the two excluded samples with their biological replicates. (E) Pearson's correlation heatmap after outlier removal, showing increased sample coherence across the remaining 22 samples containing 15,323 genes.

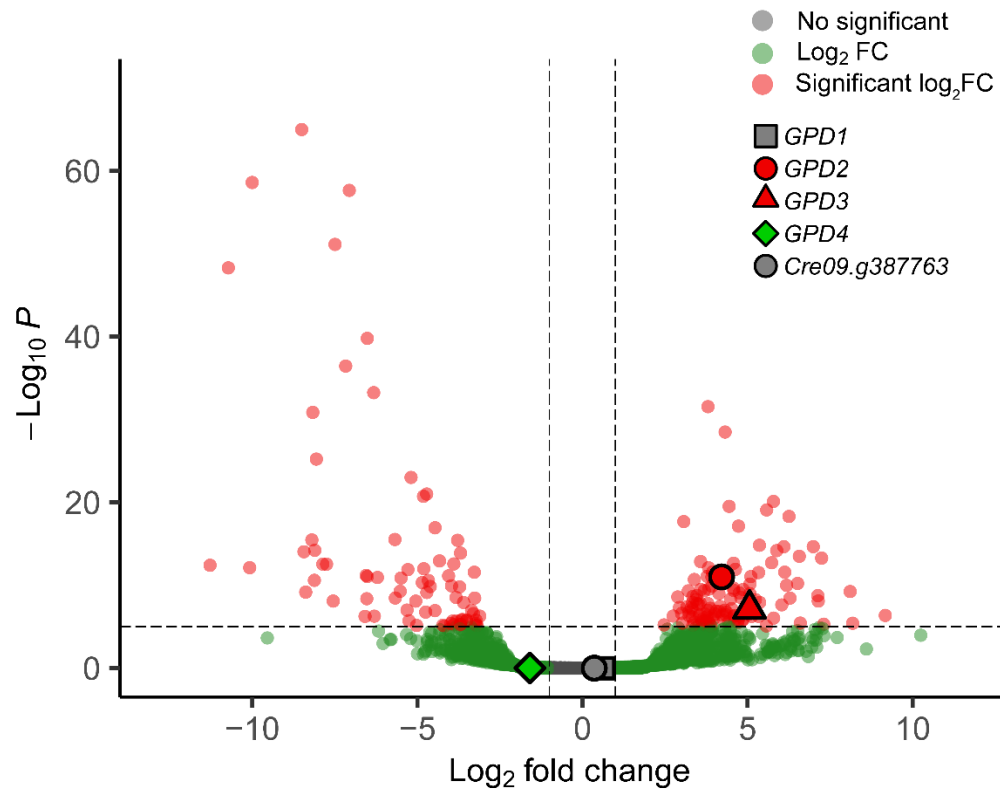

**Figure S3.** Volcano plot of differentially expressed *GPDs* genes. A total of 15323 genes is represented with 252 significant up-regulated and 136 significant down-regulated genes at  $\text{Log}_2\text{FC} = 2$  and  $p.\text{adj} < 0.05$ .

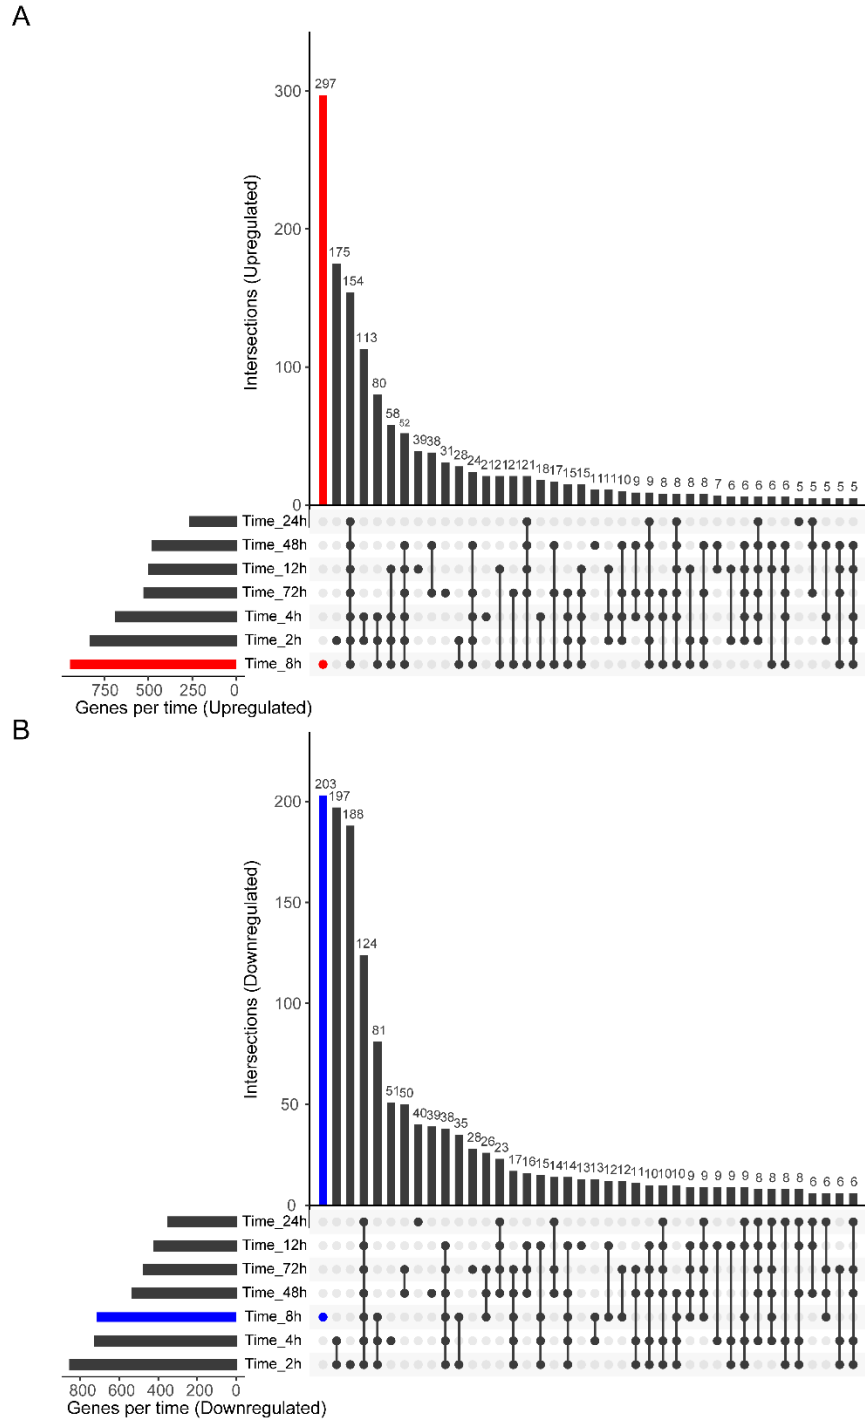

**Figure S4.** Differential gene expression analysis in response to treatment with 200 mM NaCl at different time points. (A) Intersections of up-regulated genes with a threshold of  $\text{Log}_2$  fold change ( $\text{Log}_2\text{FC}$ )  $> 2$  and  $p\text{-adj} < 0.05$ . Treatment time of 8 h includes the highest and unique number of up-regulated genes and is colored red. (B) Intersections of down-regulated genes with the same threshold. Treatment time of 2, 4, and 8 h includes the highest and unique number of down-regulated genes and is colored blue. The total number of genes analyzed was 15323. Unique up- and down-regulated genes were identified between the different treatment times.

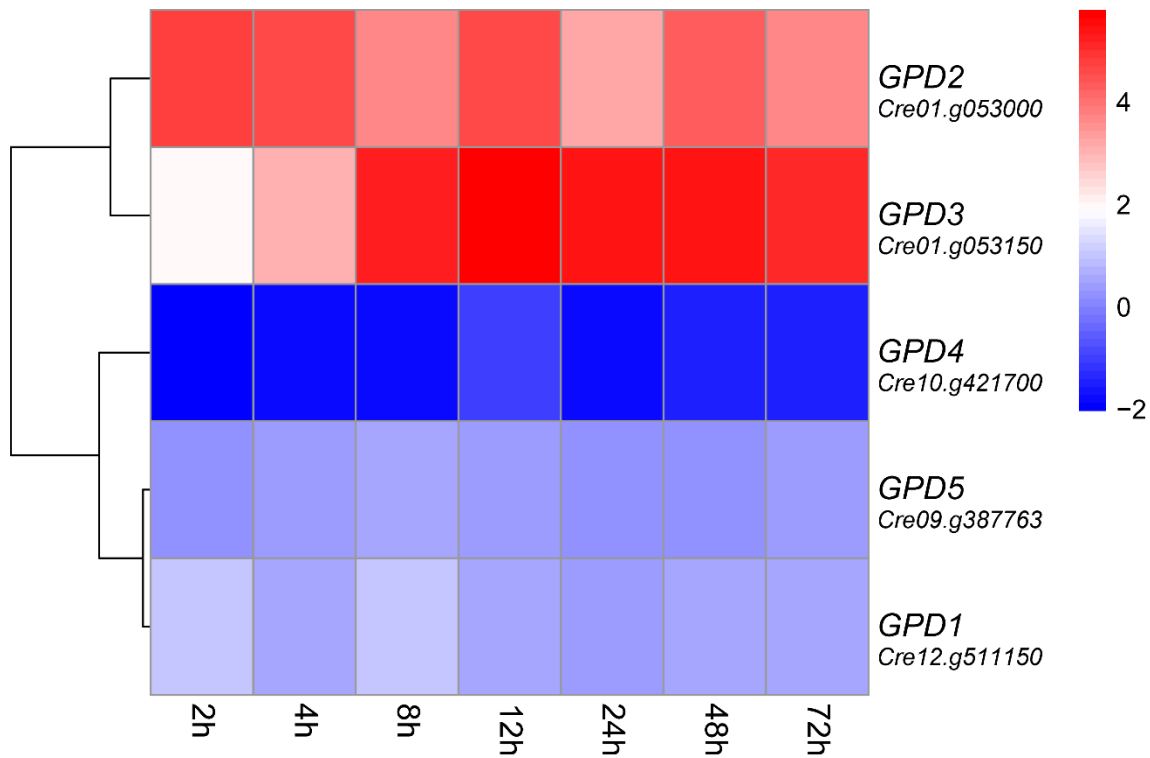

**Figure S5.** Differential expression of *GPD* genes over time under salinity conditions. The heatmap displays the log<sub>2</sub> fold change (log<sub>2</sub>FC) values obtained from differential expression analysis when treatments are compared to controls at different time-points, with a significance threshold of Log<sub>2</sub>FC  $\geq$  2 and adjusted p-value (p.adj)  $<$  0.05.

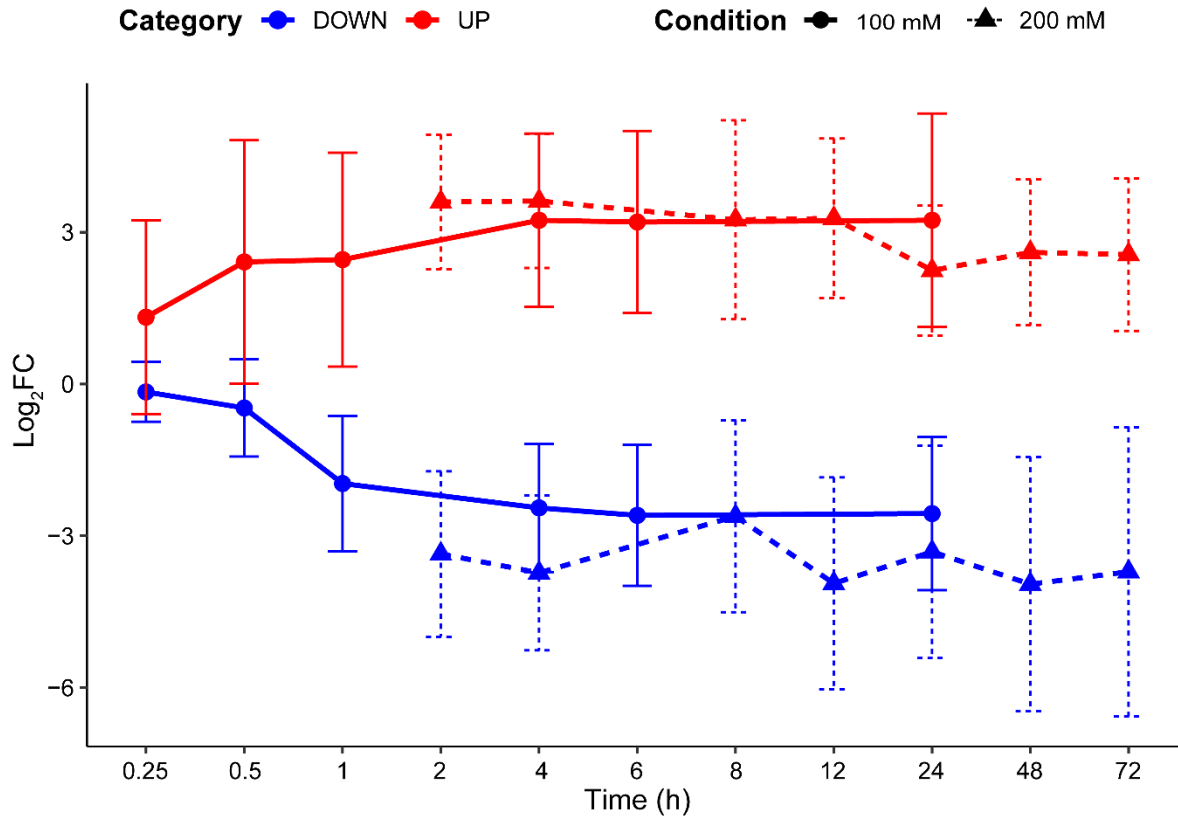

**Figure S6.** Expression profiles of differentially expressed genes consistently regulated under salinity stress in two independent RNA-seq datasets. A total of 40 genes were consistently up-regulated and 63 down-regulated at either 4 h or 24 h in both datasets: a published experiment using 100 mM NaCl (0.25 h, 0.5 h, 1 h, 4 h, 6 h, 24 h), and this study using 200 mM NaCl (2 h, 4 h, 8 h, 12 h, 24 h, 48 h, 72 h). Each line represents the mean log<sub>2</sub> fold change ( $\pm$  standard deviation) across time points for the shared gene set.

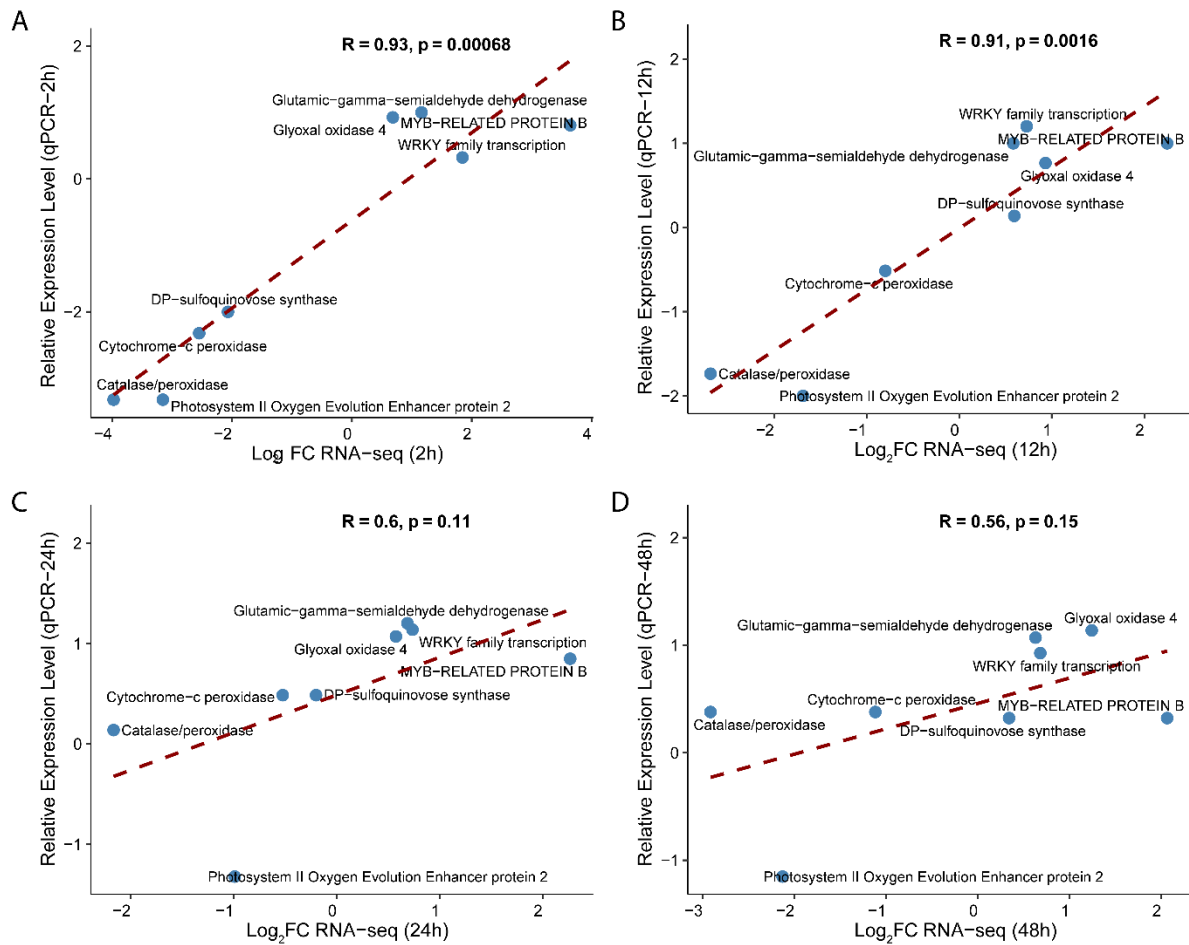

**Figure S7.** Correlation between RNA-seq and qPCR-derived expression changes at different time points under 200 mM NaCl treatment. Scatter plots show the relationship between RNA-seq-derived  $\text{Log}_2$  fold change ( $\text{Log}_2\text{FC}$ ) and qPCR mean relative expression values for eight representative genes. (A) Correlation at 2 h. (B) Correlation at 12 h. (C) Correlation at 24 h. (D) Correlation at 48 h.

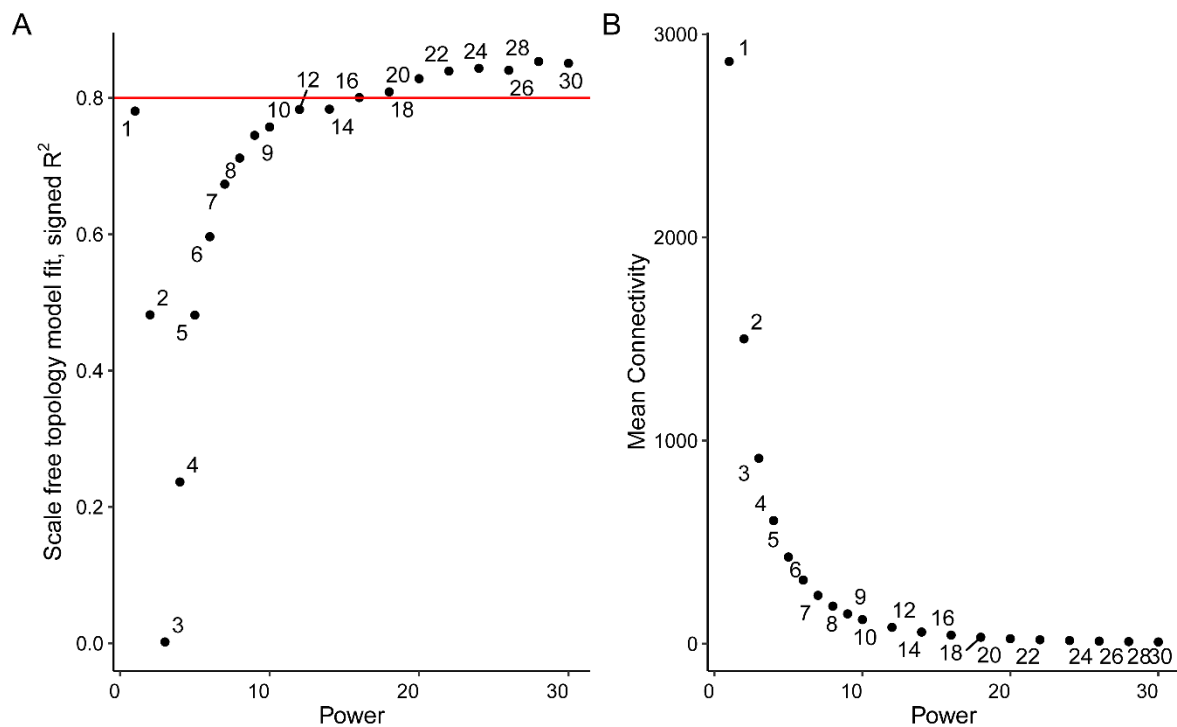

**Figure S8.** Power and mean connectivity analysis for co-expression network analysis. (A) Power analysis. (B) Mean connectivity analysis.

**Table S2.** Number of differentially expressed genes in modules identified from the comparison of samples treated with 200 mM NaCl versus untreated controls, with a threshold of  $\log_2\text{foldchange} > 2$  and  $\text{padj.} < 0.05$ .

| Module       | Up-regulated | Down-regulated |
|--------------|--------------|----------------|
| black        | 19           | 0              |
| blue         | 27           | 0              |
| green        | 0            | 107            |
| greenyellow  | 1            | 0              |
| magenta      | 18           | 0              |
| midnightblue | 2            | 0              |
| pink         | 0            | 11             |
| purple       | 2            | 0              |
| turquoise    | 183          | 0              |
| yellow       | 0            | 21             |

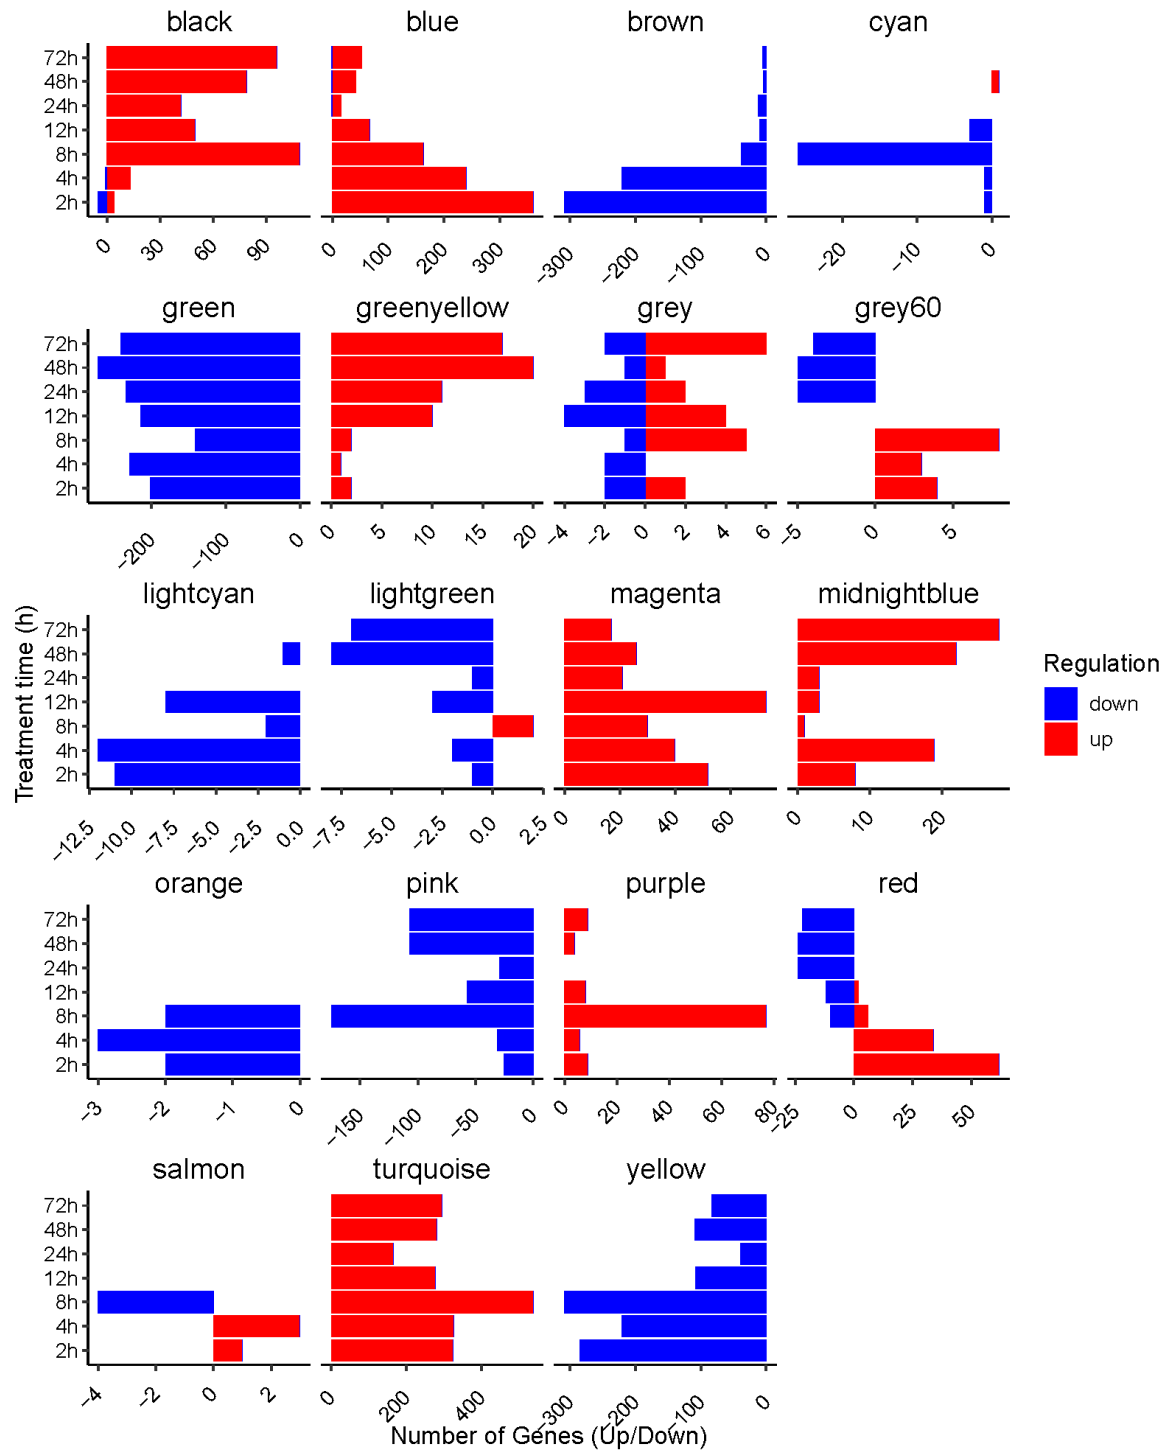

**Figure S9.** Genes differentially expressed at each treatment time with 200 mM NaCl in each module of the gene co-expression network of the *C. reinhardtii* transcriptome. Genes were identified at a threshold of  $\log_2\text{foldchange} > 2$  and  $\text{padj} < 0.05$ . Modules "darkgreen", "darkgrey", "darkred", "lightyellow", "royalblue", "tan", "white", and "darkorange" were omitted as having fewer than 3 differentially expressed genes at only 1 or 2 treatment times.

**Table S3.** Significant molecular functions (MF) and biological processes (BP) enriched in the co-expression modules (adjusted p-value < 0.05).

| Module    | ONT | GO_ID      | Term                                        | Sig. | Exp.   | Weightfisher | p-Adj    |
|-----------|-----|------------|---------------------------------------------|------|--------|--------------|----------|
| turquoise | MF  | GO:0003676 | nucleic acid binding                        | 150  | 104.43 | 4.50E-05     | 0.0016   |
| turquoise | MF  | GO:0008270 | zinc ion binding                            | 30   | 14.38  | 6.30E-05     | 0.0016   |
| turquoise | MF  | GO:0003677 | DNA binding                                 | 66   | 44.39  | 0.00067      | 0.0112   |
| turquoise | MF  | GO:0016779 | nucleotidyltransferase activity             | 9    | 2.31   | 0.00332      | 0.0415   |
| turquoise | BP  | GO:0009451 | RNA modification                            | 16   | 3.98   | 1.70E-05     | 8.00E-04 |
| turquoise | BP  | GO:0043414 | macromolecule methylation                   | 7    | 1.16   | 3.70E-05     | 9.00E-04 |
| turquoise | BP  | GO:0009190 | cyclic nucleotide biosynthetic process      | 23   | 11.16  | 0.00036      | 0.006    |
| turquoise | BP  | GO:0001522 | pseudouridine synthesis                     | 8    | 2.52   | 0.00223      | 0.0279   |
| blue      | MF  | GO:0004672 | protein kinase activity                     | 99   | 63.11  | 1.70E-06     | 1.00E-04 |
| blue      | MF  | GO:0000166 | nucleotide binding                          | 71   | 53.87  | 0.0006       | 0.015    |
| blue      | MF  | GO:0003677 | DNA binding                                 | 59   | 41.13  | 0.0025       | 0.0417   |
| blue      | BP  | GO:0000398 | mRNA splicing, via spliceosome              | 10   | 1.64   | 3.40E-07     | 0        |
| brown     | MF  | GO:0003735 | structural constituent of ribosome          | 28   | 12.16  | 2.00E-05     | 0.001    |
| brown     | BP  | GO:0008152 | metabolic process                           | 85   | 70.88  | 2.70E-06     | 1.00E-04 |
| brown     | BP  | GO:0034645 | cellular macromolecule biosynthetic proc... | 8    | 1.64   | 8.40E-05     | 0.0021   |
| brown     | BP  | GO:1901566 | organonitrogen compound biosynthetic pro... | 13   | 4.49   | 0.00025      | 0.0042   |
| brown     | BP  | GO:1901137 | carbohydrate derivative biosynthetic pro... | 5    | 1.04   | 0.00216      | 0.027    |
| brown     | BP  | GO:0009058 | biosynthetic process                        | 26   | 21.95  | 0.00463      | 0.0435   |
| brown     | BP  | GO:0044271 | cellular nitrogen compound biosynthetic ... | 15   | 16.34  | 0.00522      | 0.0435   |
| yellow    | MF  | GO:0010181 | FMN binding                                 | 6    | 1.23   | 0.00079      | 0.0212   |
| yellow    | MF  | GO:0003824 | catalytic activity                          | 248  | 203.37 | 0.00085      | 0.0212   |
| yellow    | BP  | GO:0009765 | photosynthesis, light harvesting            | 16   | 2.19   | 3.80E-12     | 0        |
| yellow    | BP  | GO:0008152 | metabolic process                           | 94   | 74.69  | 0.00035      | 0.0087   |
| green     | MF  | GO:0015079 | potassium ion transmembrane transporter ... | 5    | 1.01   | 9.50E-05     | 0.0048   |
| green     | MF  | GO:0005315 | inorganic phosphate transmembrane transp... | 5    | 0.81   | 0.00071      | 0.0178   |

|             |    |            |                                             |     |       |          |          |
|-------------|----|------------|---------------------------------------------|-----|-------|----------|----------|
| red         | MF | GO:0004175 | endopeptidase activity                      | 25  | 9.69  | 6.50E-10 | 0        |
| red         | MF | GO:0005198 | structural molecule activity                | 16  | 15.53 | 3.80E-06 | 1.00E-04 |
| red         | MF | GO:0016758 | hexosyltransferase activity                 | 6   | 1.33  | 0.0014   | 0.02     |
| red         | MF | GO:0005515 | protein binding                             | 119 | 93.35 | 0.0016   | 0.02     |
| red         | BP | GO:0006886 | intracellular protein transport             | 8   | 1.11  | 3.30E-06 | 2.00E-04 |
| red         | BP | GO:0006810 | transport                                   | 26  | 9.2   | 6.90E-05 | 0.0017   |
| red         | BP | GO:0033365 | protein localization to organelle           | 5   | 0.69  | 0.00027  | 0.0045   |
| red         | BP | GO:0030163 | protein catabolic process                   | 4   | 0.69  | 0.00328  | 0.041    |
| pink        | MF | GO:0004129 | cytochrome-c oxidase activity               | 6   | 0.67  | 1.40E-05 | 7.00E-04 |
| pink        | MF | GO:0016491 | oxidoreductase activity                     | 50  | 22.06 | 0.00052  | 0.013    |
| magenta     | MF | GO:0000166 | nucleotide binding                          | 27  | 17.74 | 0.00043  | 0.0215   |
| magenta     | BP | GO:0008652 | cellular amino acid biosynthetic process    | 4   | 0.42  | 0.00057  | 0.0243   |
| magenta     | BP | GO:0016311 | dephosphorylation                           | 4   | 0.49  | 0.00097  | 0.0243   |
| purple      | MF | GO:0005215 | transporter activity                        | 8   | 5.58  | 0.00085  | 0.0425   |
| greenyellow | BP | GO:0042309 | homoiothermy                                | 15  | 6.1   | 0.00014  | 0.007    |
| lightcyan   | MF | GO:0005488 | binding                                     | 57  | 42.95 | 0.00036  | 0.0068   |
| lightcyan   | MF | GO:0005515 | protein binding                             | 29  | 14.78 | 0.0004   | 0.0068   |
| lightcyan   | MF | GO:0016776 | phosphotransferase activity, phosphate g... | 3   | 0.15  | 0.00041  | 0.0068   |
| lightcyan   | MF | GO:0019205 | nucleobase-containing compound kinase ac... | 3   | 0.18  | 0.00064  | 0.008    |
| grey60      | BP | GO:0009190 | cyclic nucleotide biosynthetic process      | 6   | 0.99  | 0.00019  | 0.0095   |
| darkgrey    | MF | GO:0016627 | oxidoreductase activity, acting on the C... | 2   | 0.04  | 0.00058  | 0.029    |

ONT: Ontology GO;\_ID: Unique identifier for the Gene Ontology term; Sig.: Number of genes in the module associated with the GO term; Exp.: Number of genes expected to be associated with the GO term under a random distribution; weightFisher: Raw p-value obtained using the "weight01" algorithm and Fisher's exact test; p-adj: Adjusted p-value using the Benjamini & Hochberg method.

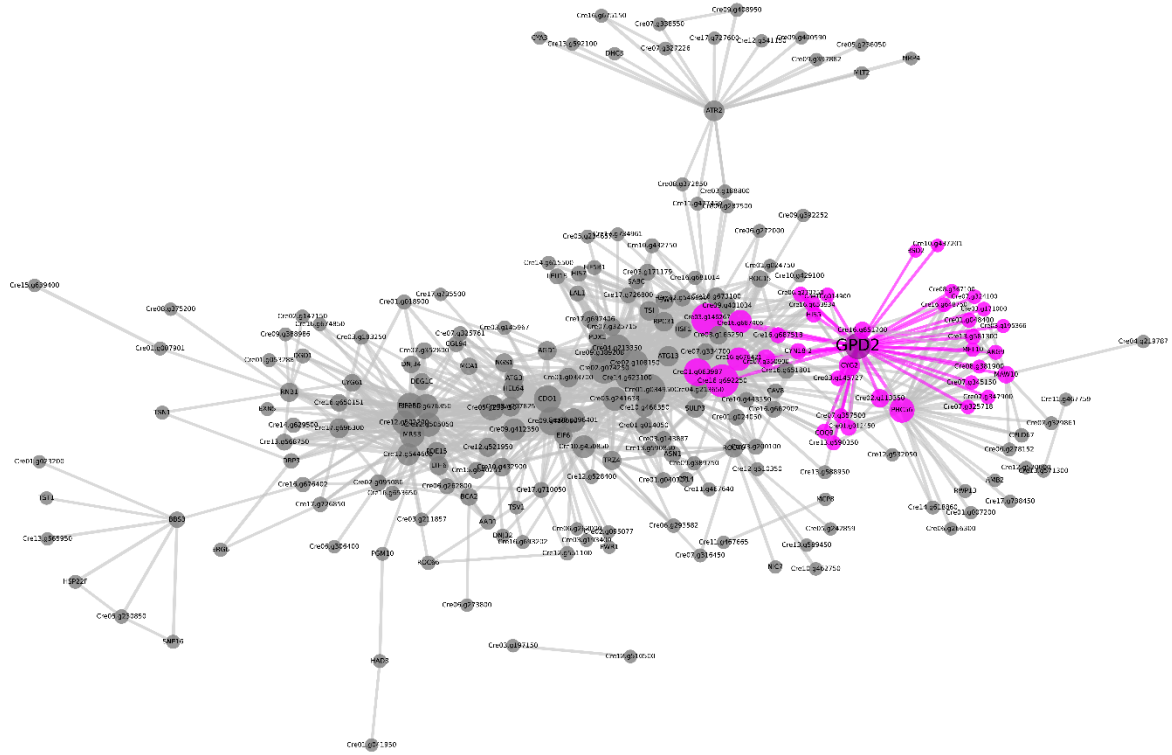

**Figure S10.** Magenta module in gene co-expression network for *C. reinhardtii* transcriptome under 200 mM NaCl treatment. Network was constructed with a weight threshold of 0.17. The location of *GPD2* within the network is indicated, with its 15 most significant connections highlighted in magenta.

**Table S4.** Expressed genes connected with *GPD2* and *GPD3* in the network co-expression analysis for the *C. reinhardtii* transcriptome under 200 mM NaCl treatment. Genes within the magenta and black modules that are connected to *GPD2* and *GPD3* genes, ranked by node degree (number of connections).

| Module  | Gene ID                                    | Description                                                                         | Node Degree | Log <sub>2</sub> FC |
|---------|--------------------------------------------|-------------------------------------------------------------------------------------|-------------|---------------------|
| Magenta | <i>Cre16.g692250</i>                       | Basic-leucine zipper (bZIP) transcription factor                                    | 66          | 3.39*               |
|         | <i>Cre03.g146267</i>                       | C2C2_GATA transcription factor (Ankyrin repeats (Ank_4))                            | 61          | 6.26*               |
|         | <i>Cre01.g063997</i>                       | ATAXIN 2-RELATED (PTHR12854)                                                        | 43          | 1.34                |
|         | <i>GPD2</i><br>( <i>Cre01.g053000</i> )    | Glycerol-3-phosphate dehydrogenase/dihydroxyacetone-3-phosphate reductase           | 37          | 4.22*               |
|         | <i>PHC56</i><br>( <i>Cre16.g654600</i> )   | Pherophorin-chlamydomonas homolog 56                                                | 34          | 2.71*               |
|         | <i>Cre16.g687406</i>                       | Unknown                                                                             | 27          | 3.94*               |
|         | <i>Cre16.g676421</i>                       | Two-Component Response Regulator-Like APRR1-Related (PTHR26402:SF465)               | 27          | 6.99*               |
|         | <i>CYG2</i><br>( <i>Cre06.g259500</i> )    | Adenylate/guanylate cyclase                                                         | 20          | 5.88*               |
|         | <i>Cre07.g350900</i>                       | Ankyrin repeats (Ank_2) // Zinc finger, C3HC4 type (RING finger) (PF12796//PF13920) | 12          | 1.74                |
|         | <i>Cre02.g113350</i>                       | Protein tyrosine kinase                                                             | 12          | 0.81                |
|         | <i>MAW10</i><br>( <i>Cre07.g325760</i> )   | Membrane-associated hydroxyproline-rich glycoprotein 10                             | 10          | 2.23                |
|         | <i>Cre16.g651700</i>                       | Unknown                                                                             | 9           | 2.13                |
|         | <i>CYN18-2</i><br>( <i>Cre12.g499400</i> ) | Cyclophilin                                                                         | 7           | 1.57                |
|         | <i>Cre16.g653934</i>                       | Unknown                                                                             | 7           | 1.89                |
|         | <i>Cre13.g581300</i>                       | Unknown                                                                             | 6           | 1.28                |
|         | <i>Cre01.g012450</i>                       | E3 Ubiquitin-Protein Ligase HUWE1 (PTHR11254:SF291)                                 | 6           | 1.76                |
|         | <i>Cre16.g687518</i>                       | EIF2B1-Translation initiation factor eIF-2B subunit alpha (K03239)                  | 6           | 1.57                |
|         | <i>HIS5</i><br>( <i>Cre16.g672385</i> )    | Histidinol phosphate aminotransferase                                               | 5           | 1.16                |
|         | <i>Cre03.g145727</i>                       | Tyrosine-TRNA Ligase (PTHR11946:SF53)                                               | 5           | 1.35                |
|         | <i>Cre06.g270750</i>                       | Calmodulin binding protein-like (PF07887)                                           | 5           | 1.10                |
|         | <i>COQ9</i>                                | Ubiquinone biosynthesis protein                                                     | 5           | 1.45                |

|       |                                          |                                                                                             |    |        |
|-------|------------------------------------------|---------------------------------------------------------------------------------------------|----|--------|
|       | <i>ARG9</i><br>( <i>Cre06.g278163</i> )  | Acetylornithine aminotransferase                                                            | 4  | 1.42   |
|       | <i>Cre13.g590350</i>                     | bZIP transcription factor                                                                   | 4  | 0.93   |
|       | <i>Cre01.g014900</i>                     | Unknown                                                                                     | 4  | 0.67   |
|       | <i>Cre07.g357500</i>                     | Unknown                                                                                     | 4  | 0.88   |
|       | <i>Cre01.g048400</i>                     | zinc finger protein DZIP1 (K16470)                                                          | 4  | 1.96   |
|       | <i>MFT10</i><br>( <i>Cre02.g095076</i> ) | Major facilitator superfamily transporter                                                   | 3  | 3.38*  |
|       | <i>Cre07.g325718</i>                     | Unknown                                                                                     | 3  | 4.8*   |
|       | <i>Cre08.g367100</i>                     | Unknown                                                                                     | 3  | 1.98   |
|       | <i>Cre03.g171000</i>                     | Non-specific serine/threonine protein kinase / Threonine-specific protein kinase (2.7.11.1) | 3  | 1.12   |
|       | <i>Cre07.g324100</i>                     | Dopamine Beta Hydroxylase Related (PTHR10157)                                               | 3  | 0.93   |
|       | <i>Cre07.g345150</i>                     | Alpha-tubulin N-acetyltransferase / Tubulin N-acetyltransferase (2.3.1.108)                 | 3  | 1.15   |
|       | <i>Cre07.g347900</i>                     | F-BOX And WD40 Domain Protein (PTHR22844)                                                   | 3  | 1.50   |
|       | <i>Cre16.g648750</i>                     | SMG-7 Suppressor with Morphological Effect On Genitalia Protein 7 (PTHR15696)               | 3  | 1.05   |
|       | <i>Cre03.g195366</i>                     | Unknown                                                                                     | 2  | 3.08*  |
|       | <i>Cre08.g381900</i>                     | Ring Zinc Finger Protein (PTHR22763)                                                        | 2  | 0.62   |
|       | <i>BSD2</i><br>( <i>Cre16.g678773</i> )  | 3-beta hydroxysteroid dehydrogenase                                                         | 1  | 0.74   |
|       | <i>Cre10.g437201</i>                     | Serine-Threonine Protein Kinase (PTHR23257)                                                 | 1  | 1.28   |
| Black | <i>Cre10.g454350</i>                     | Unknown                                                                                     | 94 | 1.84   |
|       | <i>OGT1</i><br>( <i>Cre12.g552851</i> )  | O-linked N-acetylglucosamine transferase                                                    | 90 | 3.85*+ |
|       | <i>Cre17.g741272</i>                     | Unknown                                                                                     | 40 | 2.72   |
|       | <i>Cre03.g201650</i>                     | Unknown                                                                                     | 35 | 2.46   |
|       | <i>Cre08.g358600</i>                     | Unknown                                                                                     | 16 | 2.08   |
|       | <i>GPD3</i><br>( <i>Cre01.g053150</i> )  | Glycerol-3-phosphate dehydrogenase/dihydroxyacetone-3-phosphate reductase                   | 14 | 5.06*  |
|       | <i>Cre11.g481150</i>                     | Unknown                                                                                     | 12 | 2.89   |
|       | <i>Cre08.g365500</i>                     | Unknown                                                                                     | 6  | 1.23   |
|       | <i>Cre12.g489450</i>                     | Unknown                                                                                     | 5  | 1.61   |
|       | <i>Cre09.g397586</i>                     | Unknown                                                                                     | 4  | 1.44   |
|       | <i>Cre13.g605900</i>                     | Unknown                                                                                     | 3  | 1.14   |
|       | <i>Cre02.g095084</i>                     | Glycosyltransferase 14 family member (PTHR19297)                                            | 2  | 4.83*  |

|                      |                                                                                    |   |       |
|----------------------|------------------------------------------------------------------------------------|---|-------|
| <i>Cre07.g320950</i> | CPG Binding Protein // PHD Finger Protein Alfin-Like 4 (PTHR12321//PTHR12321:SF55) | 2 | 0.74  |
| <i>Cre08.g380800</i> | Unknown                                                                            | 2 | 1.39  |
| <i>Cre02.g095085</i> | Predicted Na <sup>+</sup> -dependent cotransporter (KOG4821)                       | 1 | 4.62* |

Significance ( $p_{adj} < 0.05$ ) at the Log2FC value is indicated with asterisks (\*).  
Hub genes are indicated with + symbol.

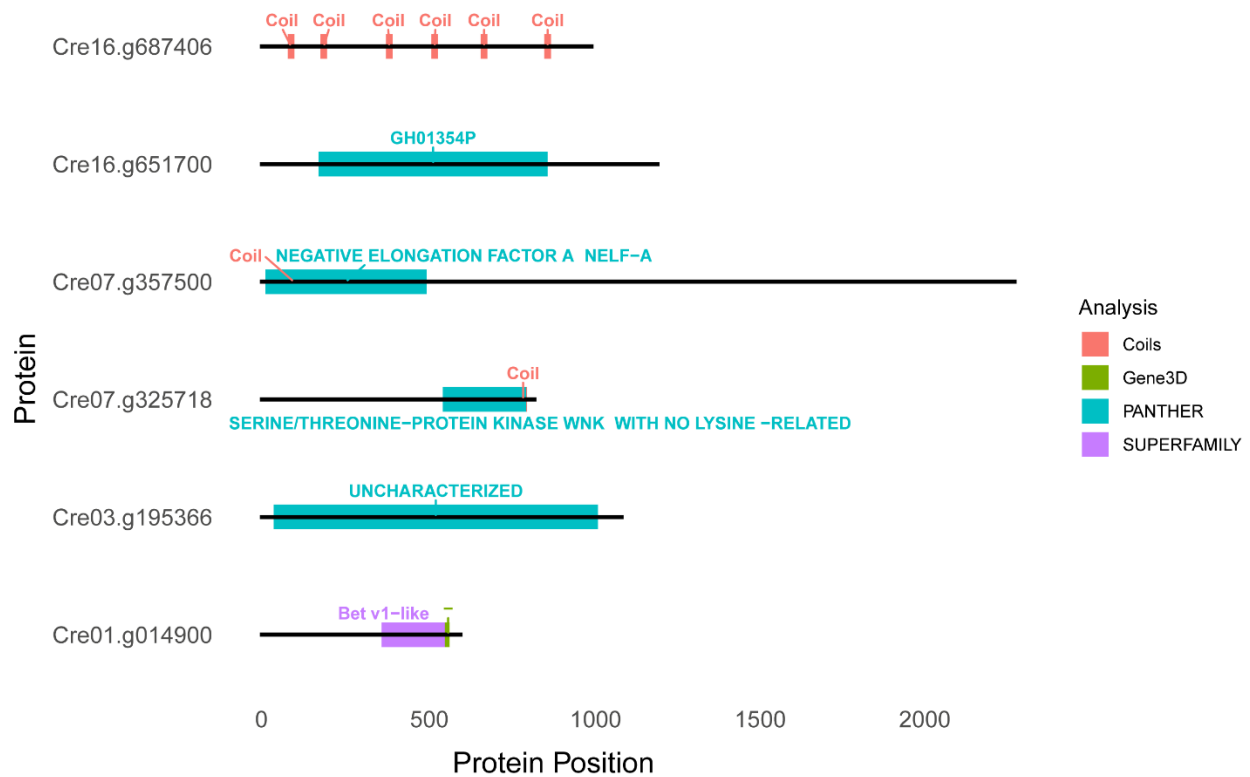

**Figure S11.** Functional annotation of proteins encoded by uncharacterized genes connected to *GPD2* in the magenta module. Annotation was performed using InterProScan (v5.59-91.0). Black lines represent the length of the proteins, illustrating the domains and functional motifs identified with bars.

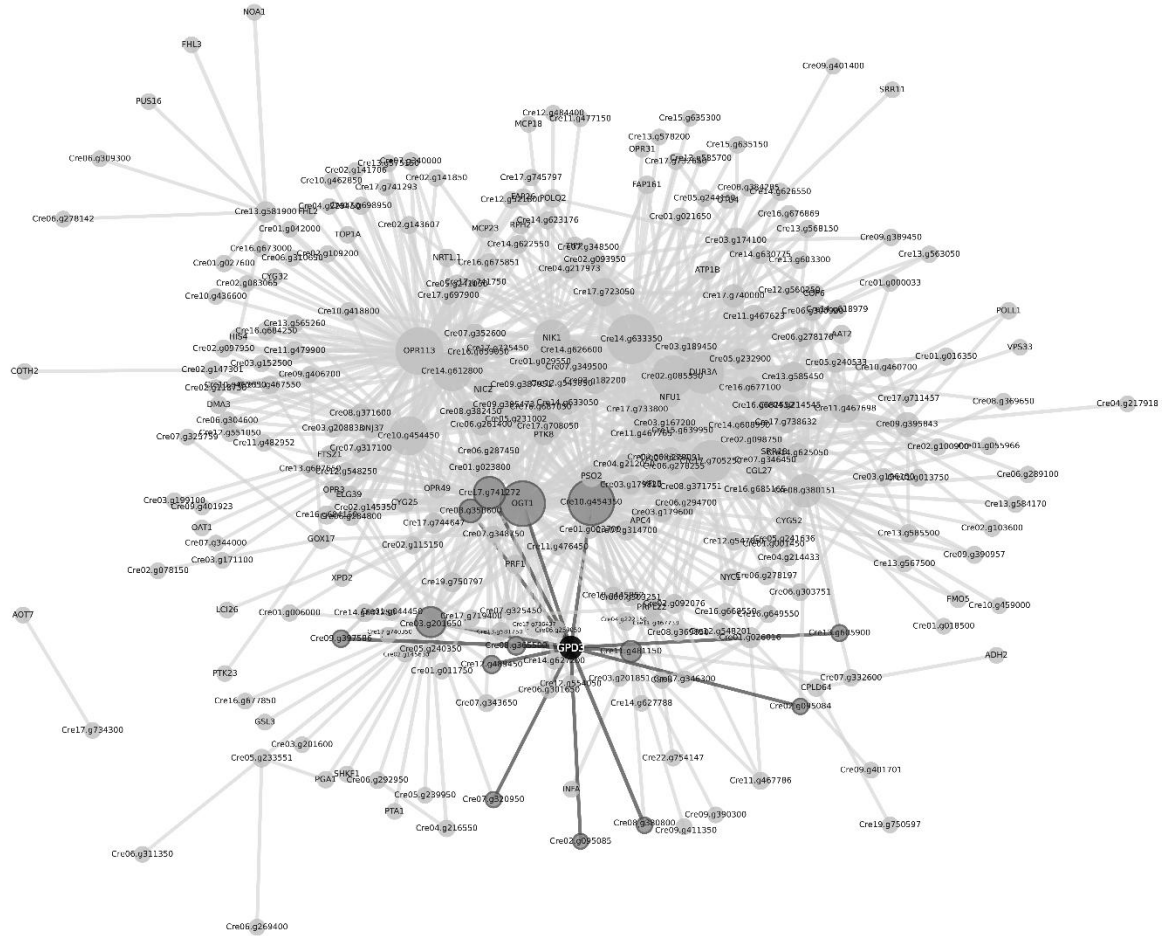

**Figure S12.** Black module in gene co-expression network for *C. reinhardtii* transcriptome under 200 mM NaCl treatment. Network was constructed with a weight threshold of 0.17. The location of *GPD3* within the network is indicated into the black circle with white text, with its connections highlighted in gray circles and black text.

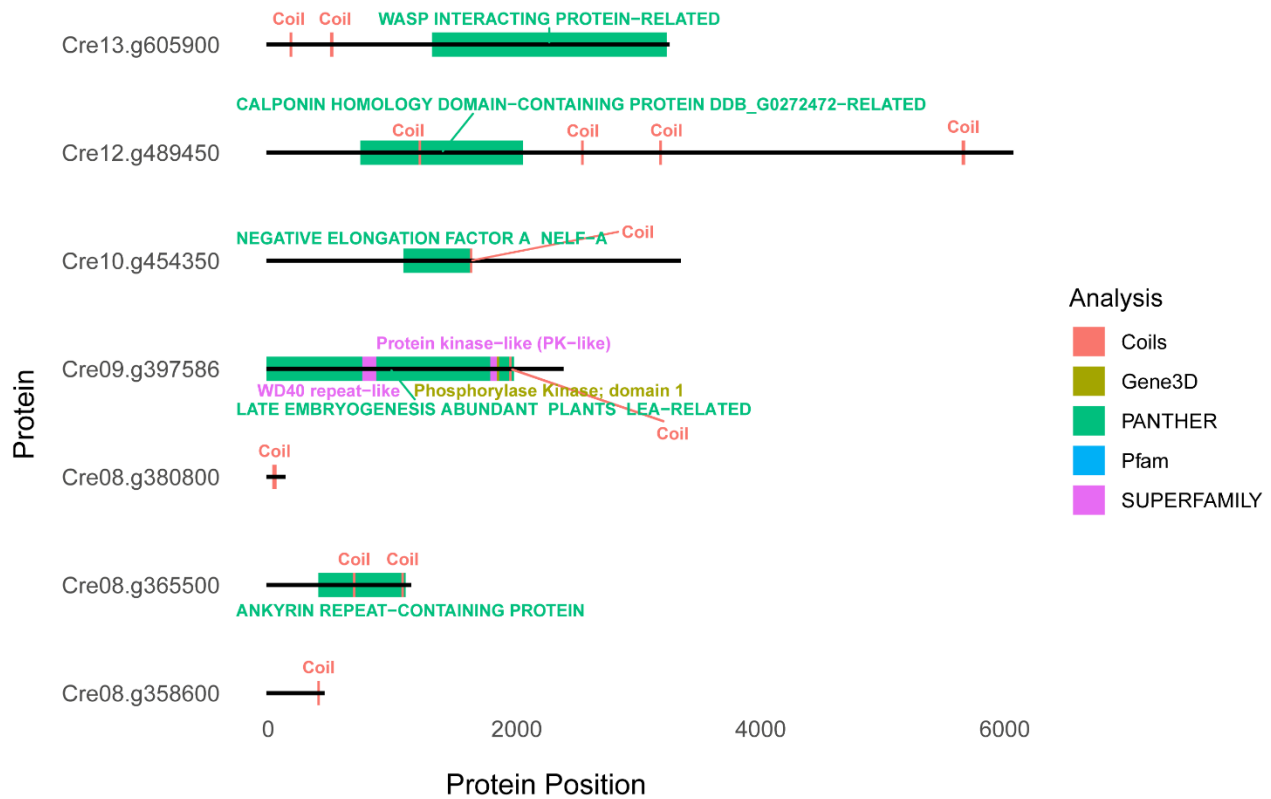

**Figure S13.** Functional annotation of proteins encoded by uncharacterized genes connected to *GPD3* in the black module. Annotation was performed using InterProScan (v5.59-91.0). Black lines represent the length of the proteins, illustrating the domains and functional motifs identified with bars.

**Table S5.** Node degree (Connectivity) of qPCR-validated genes across weight thresholds in co-expression modules.

| Gene                 | Module | Annotation                                       | 0.02 | 0.0     | 0.1     | 0.1     | 0.1     | 0.2    |
|----------------------|--------|--------------------------------------------------|------|---------|---------|---------|---------|--------|
| <b>Cre17.g732350</b> | black  | Glyoxal oxidase 4                                | 290  | 13<br>4 | 21      | 2       | 5<br>7  | 0<br>0 |
| <b>Cre02.g103450</b> | blue   | MYB-RELATED<br>PROTEIN B                         | 1210 | 97<br>7 | 60<br>3 | 31<br>5 | 21<br>0 | 60     |
| <b>Cre04.g228400</b> | blue   | WRKY family<br>transcription                     | 1291 | 99<br>1 | 51<br>1 | 12<br>7 | 49      | 22     |
| <b>Cre03.g146527</b> | salmon | Glutamic-gamma-<br>semialdehyde<br>dehydrogenase | 139  | 90      | 19      | 2       | 0       | 0      |

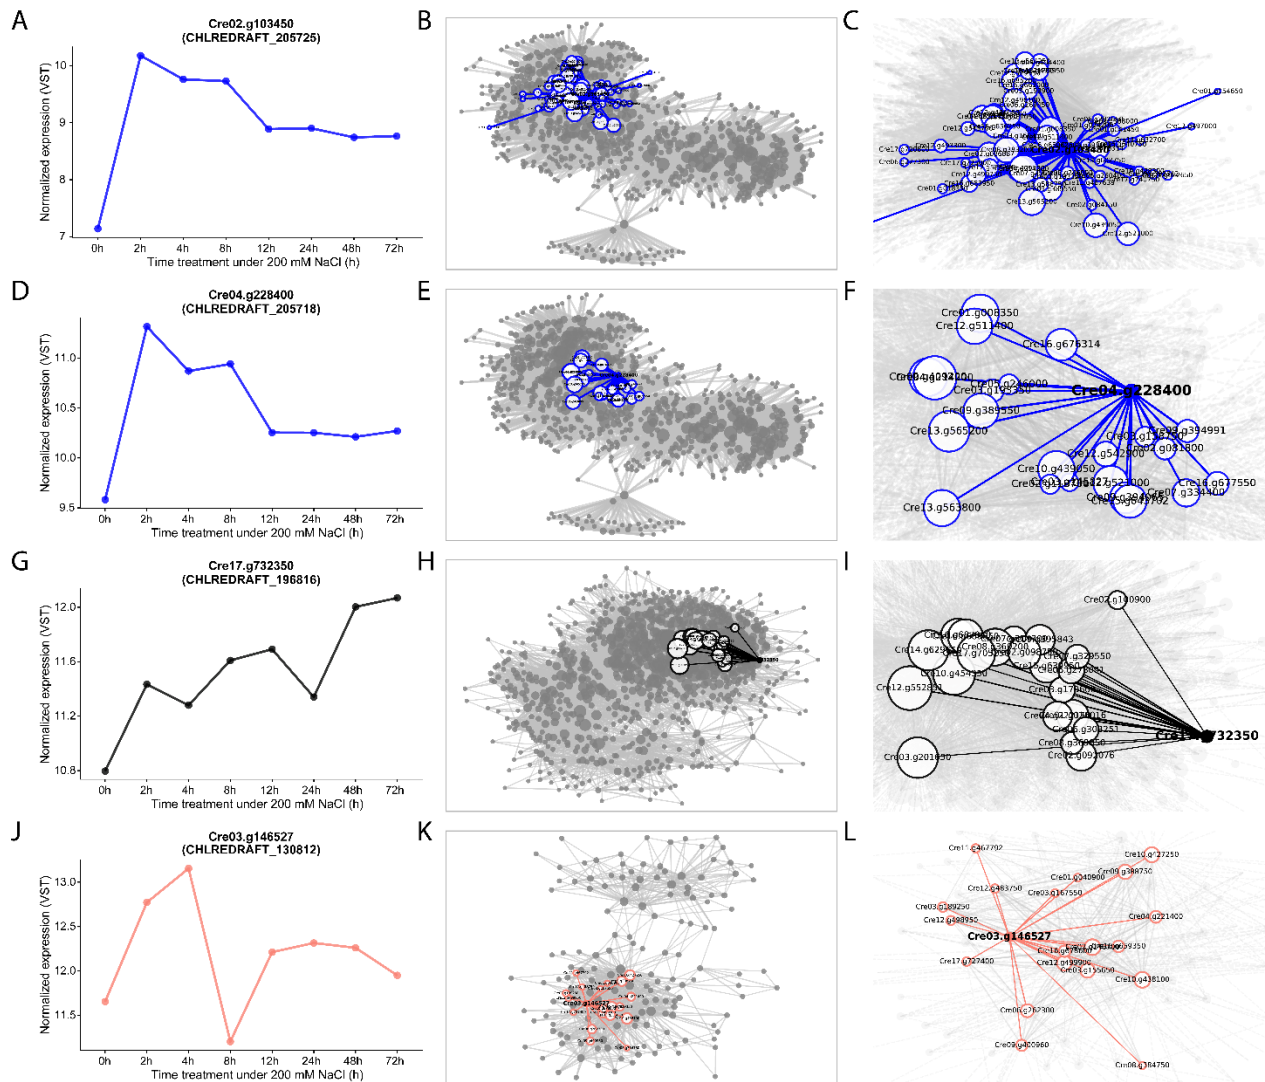

**Figure S14.** Expression profiles, co-expression subnetworks, and close-up views of gene neighborhoods validated by qPCR under 200 mM NaCl in *C. reinhardtii*. (A) Expression profile of *MYB* (*Cre02.g103450*). (B) MYB-centered network within the blue module (weight threshold = 0.20). (C) Subnetwork of MYB. (D) Expression profile of *WRKY* TF (*Cre04.g228400*). (E) WRKY-centered network within the blue module (weight threshold = 0.20). (F) Subnetwork of *WRKY*. (G) Expression profile of glyoxal oxidase 4 (*GLOX4*; *Cre17.g732350*). (H) *GLOX4*-centered network within the black module (weight threshold = 0.10). (I) Subnetwork of *GLOX4*. (J) Expression profile of glutamic- $\gamma$ -semialdehyde dehydrogenase (*GSDH*; *Cre03.g146527*). (K) *GSDH*-centered network within the salmon module (weight threshold = 0.15). (L) Subnetwork of *GSDH*.

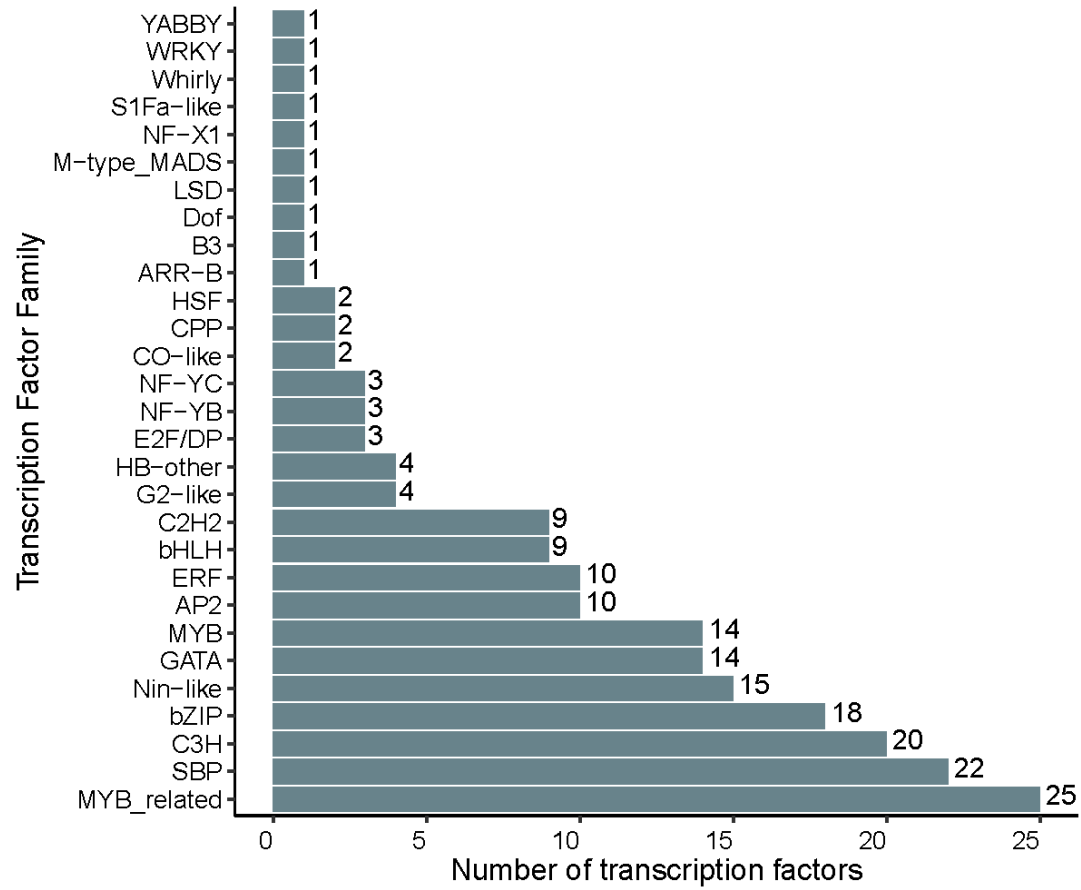

**Figure S15.** Number of transcription factors per family identified in the gene co-expression network of *C. reinhardtii* under salinity conditions at 200 mM NaCl.



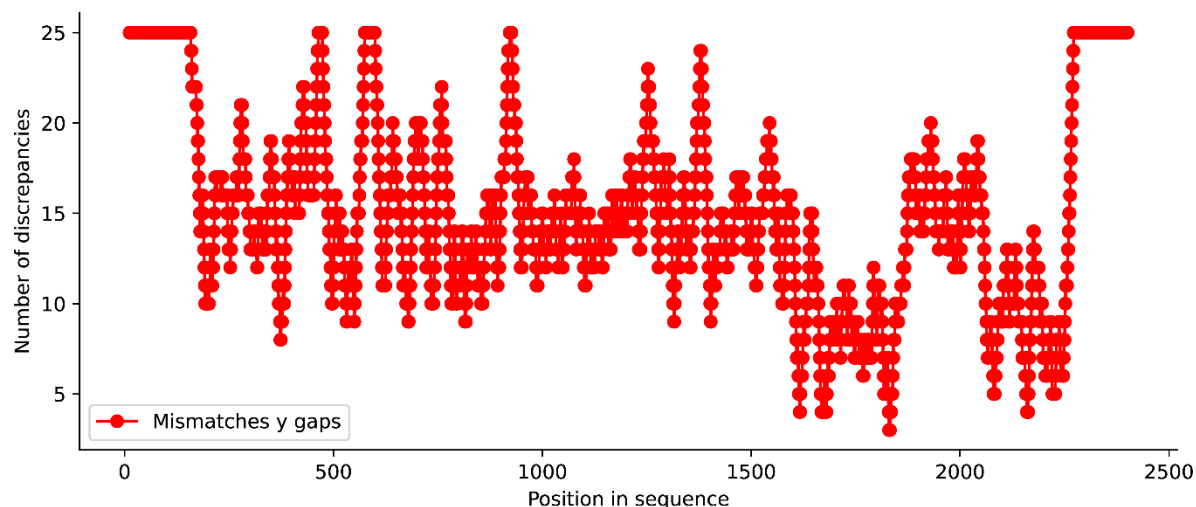

**Figure S17.** Discrepancy graph of the 2-kbp promoter regions of *GPD2* and *GPD3* genes aligned using the Clustal Omega algorithm (EMBL-EBI). The graph quantifies mismatches and gaps in 25-bp windows, illustrating sequence variation and conservation across these promoter regions.

**Table S6.** Number of *Cis*-regulatory elements (CREs) within the 2000 bp upstream promoter regions of *GPD2* and *GPD3* genes in *C. reinhardtii*.

| CRE Type                           | <i>GPD2</i> | <i>GPD3</i> | Function                                                                                |
|------------------------------------|-------------|-------------|-----------------------------------------------------------------------------------------|
| AAGAA-motif                        | 0           | 1           | --                                                                                      |
| A-box/ CCGTCC motif/<br>CCGTCC box | 9           | 4           | <i>cis</i> -acting regulatory element                                                   |
| ABRE/ ABRE3a/ ABRE4                | 5           | 15          | <i>cis</i> -acting element involved in the abscisic acid responsiveness                 |
| AC-I                               | 0           | 1           | --                                                                                      |
| ACTCATCCT sequence                 | 1           | 0           | --                                                                                      |
| ARE                                | 1           | 3           | <i>cis</i> -acting regulatory element essential for the anaerobic induction             |
| as-1/ TGACG-motif/<br>CGTCA-motif  | 9           | 5           | <i>cis</i> -acting regulatory element involved in the MeJA-responsiveness               |
| AT~ABRE                            | 0           | 1           | --                                                                                      |
| AT-rich element                    | 0           | 1           | binding site of AT-rich DNA binding protein (ATBP-1)                                    |
| AuxRR-core                         | 1           | 0           | <i>cis</i> -acting regulatory element involved in auxin responsiveness                  |
| box S                              | 0           | 2           |                                                                                         |
| CAAT-box                           | 20          | 20          | common <i>cis</i> -acting element in promoter and enhancer regions, MYBHv1 binding site |
| CAT-box/ CCAAT-box                 | 1           | 1           | --                                                                                      |
| DRE core/ DRE1                     | 3           | 1           | --                                                                                      |
| GATA-motif                         | 1           | 1           | part of a light responsive element                                                      |
| G-box                              | 3           | 6           | <i>cis</i> -acting regulatory element involved in light responsiveness                  |

|                                                                |   |   |                                                                       |
|----------------------------------------------------------------|---|---|-----------------------------------------------------------------------|
| GC-motif                                                       | 3 | 1 | enhancer-like element involved in anoxic specific inducibility        |
| GT1-motif                                                      | 0 | 2 | light responsive element                                              |
| LAMP-element                                                   | 1 | 0 | part of a light responsive element                                    |
| LTR                                                            | 1 | 1 | <i>cis</i> -acting element involved in low-temperature responsiveness |
| MYB/ MYB recognition site/ Myb-binding site/ MYB-like sequence | 5 | 6 | MYB binding site involved in drought-inducibility                     |
| MYC                                                            | 1 | 2 | --                                                                    |
| Sp1                                                            | 3 | 1 | light responsive element                                              |
| STRE                                                           | 7 | 9 | --                                                                    |
| TATA-box                                                       | 0 | 4 | core promoter element around -30 of transcription start               |
| TCT-motif                                                      | 0 | 1 | part of a light responsive element                                    |
| TGA-box                                                        | 1 | 1 | part of an auxin-responsive element                                   |
| TGA-element                                                    | 0 | 3 | auxin-responsive element                                              |
| W box                                                          | 0 | 1 | --                                                                    |
| WRE3                                                           | 0 | 2 | --                                                                    |

---

**Table S7.** Genes involved in lipid metabolism in the magenta and black modules.

| Module  | Gene          | Symbol | Phytozome Description/ AutoDefine                                                                      | KEG<br>G ID | KEGG_gI<br>D          | KEGG_path_de<br>sc                 |
|---------|---------------|--------|--------------------------------------------------------------------------------------------------------|-------------|-----------------------|------------------------------------|
| magenta | Cre01.g033450 | --     | (1 of 100) PTHR12393:SF6 - SPHINGOMYELIN PHOSPHODIESTERASE 2                                           | 600         | CHLRE_01<br>g033450v5 | Sphingolipid<br>metabolism         |
| magenta | Cre01.g053000 | GPD2   | Glycerol-3-phosphate dehydrogenase/dihydroxyacetone-3-phosphate reductase                              | 564         | CHLRE_01<br>g053000v5 | Glycerophosphol<br>ipid metabolism |
| magenta | Cre03.g198050 | --     | (1 of 3) PTHR19308 - Phosphatidylcholine Transfer Protein                                              | --          | --                    | --                                 |
| magenta | Cre05.g248200 | --     | (1 of 2) PTHR21493//PTHR21493:SF124 - CGI-141-Related/Lipase Containing Protein // Subfamily Not Named | --          | --                    | --                                 |
| magenta | Cre06.g275150 | CGL69  | conserved protein with lipase motif                                                                    | --          | --                    | --                                 |
| magenta | Cre09.g401034 | --     | (1 of 100) PTHR12393:SF6 - Sphingomyelin Phosphodiesterase 2                                           | 600         | CHLRE_09<br>g401034v5 | Sphingolipid<br>metabolism         |
| magenta | Cre10.g425100 | --     | (1 of 1) PTHR24185//PTHR24185:SF1 - Family Not Named // Calcium-Independent Phospholipase A2-Gamma     | --          | --                    | --                                 |
| magenta | Cre10.g450850 | --     | (1 of 1) PF00168//PF16016 - C2 domain (C2) // Domain of unknown function (DUF4782) (DUF4782)           | --          | --                    | --                                 |
| magenta | Cre10.g463600 | TGL17  | Triacylglycerol lipase                                                                                 | --          | --                    | --                                 |
| magenta | Cre12.g506600 | LPN1   | Lipin family protein                                                                                   | 565         | CHLRE_12<br>g506600v5 | Ether lipid<br>metabolism          |
| magenta | Cre14.g618350 | --     | (1 of 100) PTHR12393:SF6 - Sphingomyelin Phosphodiesterase 2                                           | 600         | CHLRE_14<br>g618350v5 | Sphingolipid<br>metabolism         |
| magenta | Cre17.g699100 | TGL20  | Triacylglycerol lipase                                                                                 | --          | --                    | --                                 |
| black   | Cre01.g049750 | --     | (1 of 1) PTHR12714:SF11 - C-terminal s-isoprenylcysteine carboxyl o-methyltransferase                  | 564         | CHLRE_01<br>g049750v5 | Glycerophosphol<br>ipid metabolism |
| black   | Cre01.g053150 | GPD3   | Glycerol-3-phosphate dehydrogenase/dihydroxyacetone-3-phosphate reductase                              | 564         | CHLRE_01<br>g053150v5 | Glycerophosphol<br>ipid metabolism |

|       |               |       |                                                                    |     |                       |                            |
|-------|---------------|-------|--------------------------------------------------------------------|-----|-----------------------|----------------------------|
| black | Cre02.g117200 | --    | Putative beta-galactosidase. GH42 family                           | 600 | CHLRE_02<br>g117200v5 | Sphingolipid<br>metabolism |
| black | Cre03.g174950 | TGL7  | Triacylglycerol lipase                                             | --  | --                    | --                         |
| black | Cre03.g182650 | PGA1  | Phospholipid/glycerol acyltransferase                              | --  | --                    | --                         |
| black | Cre03.g183650 | GDP4  | Glycerophosphoryl diester phosphodiesterase family protein         | --  | --                    | --                         |
| black | Cre04.g218200 | --    | 1 of 100) PTHR12393:SF6 - Sphingomyelin phosphodiesterase 2        | 600 | CHLRE_04<br>g218200v5 | Sphingolipid<br>metabolism |
| black | Cre04.g219200 | CPL19 | possible serine esterase                                           | --  | --                    | --                         |
| black | Cre05.g244150 | --    | (1 of 100) PTHR12393:SF6 - SPHINGOMYELIN PHOSPHODIESTERASE 2       | 600 | CHLRE_05<br>g244150v5 | Sphingolipid<br>metabolism |
| black | Cre07.g319600 | FAE3  | Putative 3-keto-acyl-CoA synthase                                  | 61  | CHLRE_07<br>g319600v5 | Fatty acid<br>biosynthesis |
| black | Cre08.g373050 | BCC3  | Acetyl-CoA biotin carboxyl carrier                                 | 61  | CHLRE_08<br>g373050v5 | Fatty acid<br>biosynthesis |
| black | Cre09.g397068 | --    | (1 of 100) PTHR12393:SF6 – Sphingomyelin phosphodiesterase 2       | 600 | CHLRE_09<br>g397068v5 | Sphingolipid<br>metabolism |
| black | Cre09.g398289 | LPAAT | related to plastidic lysophosphatidic acid acyltransferase (LPAAT) | 561 | CHLRE_09<br>g398289v5 | Glycerolipid<br>metabolism |
| black | Cre10.g422850 | --    | (1 of 5) PTHR11614:SF87 - Monoglyceride Lipase                     | --  | --                    | --                         |
| black | Cre11.g467850 | PGA6  | Putative phospholipid/glycerol acyltransferase                     | --  | --                    | --                         |
| black | Cre12.g498750 | LIP2  | Triacylglycerol lipase                                             | --  | --                    | --                         |
| black | Cre13.g585700 | --    | C2 domain (Calcium/lipid-binding domain, CaLB)                     | --  | --                    | --                         |
| black | Cre15.g635300 | --    | (1 of 100) PTHR12393:SF6 - Sphingomyelin phosphodiesterase 2       | 600 | CHLRE_15<br>g635300v5 | Sphingolipid<br>metabolism |
| black | Cre16.g671400 | ARS1  | Periplasmic arylsulfatase                                          | 600 | CHLRE_16<br>g671400v5 | Sphingolipid<br>metabolism |

---

KEGG\_ID: KEGG database pathway ID; KEGG\_gID: Gene ID in KEGG database; KEGG\_path\_desc: KEGG pathway description.

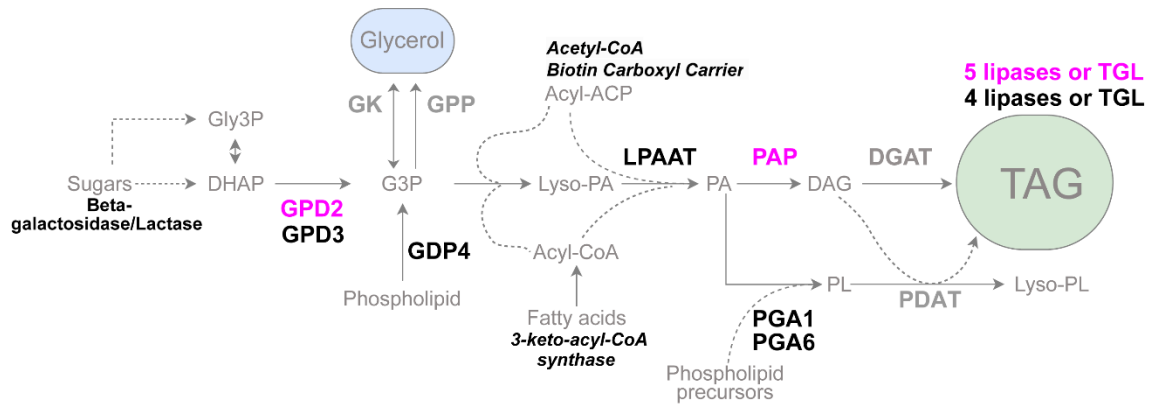

**Figure S18.** Metabolic pathway of glycerol and triacylglycerol (TAG) biosynthesis in *C. reinhardtii*, highlighting *GPD2* and *GPD3* participation and their co-expression associations under salinity. The diagram emphasizes *GPD2* and *GPD3* roles within glycerol and TAG metabolism. Genes co-expressed with *GPD2* and *GPD3* are highlighted in magenta and black, corresponding to the magenta and black modules, respectively.

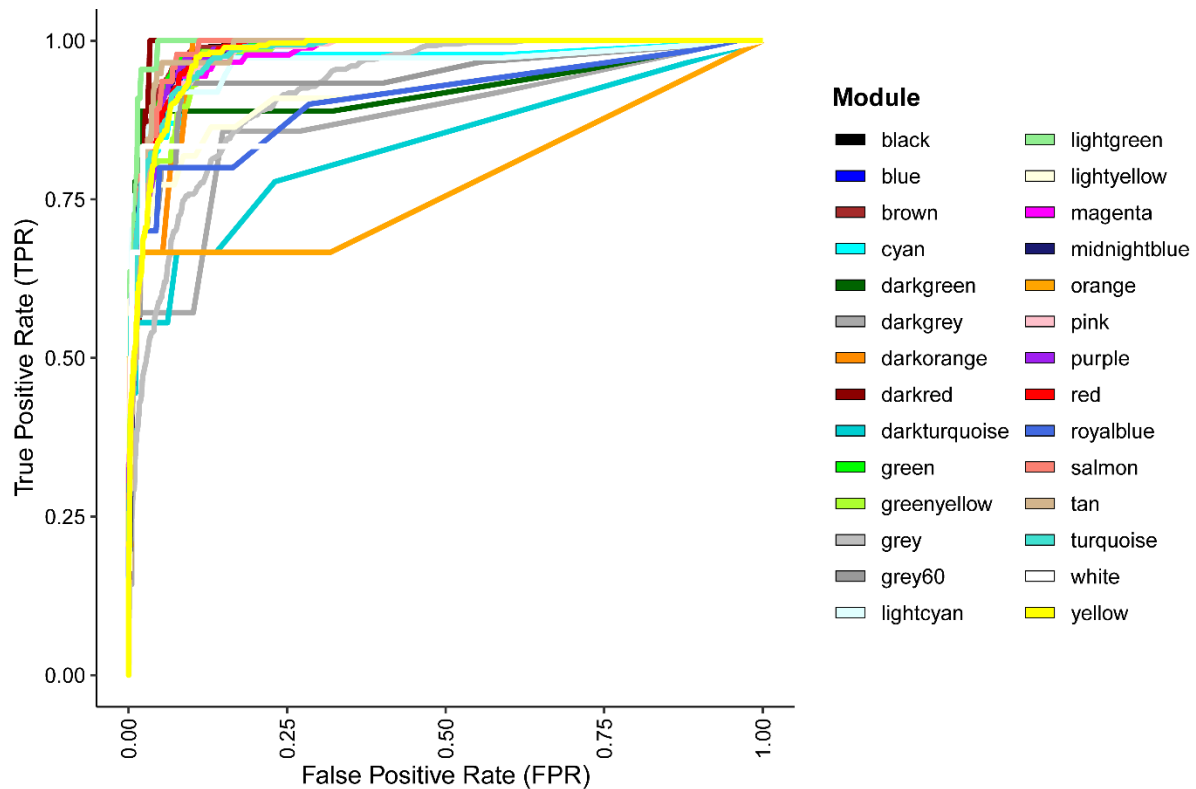

**Figure S19.** One-vs-rest ROC curves for each of the 28 modules in the test set. Each curve represents the true positive rate (TPR) versus false positive rate (FPR) for a specific module. The global area under the curve (AUC) was 0.949.

**Table S8.** Performance metrics of the Random Forest classifier for module assignment. Classification metrics including sensitivity, specificity, positive predictive value, negative predictive value, prevalence, detection rate, detection prevalence, and balanced accuracy are reported for each co-expression module identified by WGCNA.

| Module (Class)          | Sensitivity | Specificity | Pos Pred Value | Neg Pred Value | Prevalence | Detection Rate | Detection Prevalence | Balanced Accuracy |
|-------------------------|-------------|-------------|----------------|----------------|------------|----------------|----------------------|-------------------|
| Class: black            | 0.74336     | 0.97807     | 0.73043        | 0.97945        | 0.07403    | 0.05503        | 0.07534              | 0.86072           |
| Class: blue             | 0.80872     | 0.97241     | 0.76025        | 0.97917        | 0.09761    | 0.07894        | 0.10383              | 0.89057           |
| Class: brown            | 0.83571     | 0.97367     | 0.76221        | 0.98325        | 0.09171    | 0.07665        | 0.10056              | 0.90469           |
| Class: cyan             | 0.56521     | 0.99667     | 0.72222        | 0.99337        | 0.01506    | 0.00851        | 0.01179              | 0.78094           |
| Class: darkgreen        | 0.33333     | 0.99901     | 0.5            | 0.99803        | 0.00294    | 0.00098        | 0.00196              | 0.66617           |
| Class: darkgrey         | 0           | 0.99967     | 0              | 0.99770        | 0.00229    | 0              | 0.00032              | 0.49983           |
| Class: darkorange       | 0.1666      | 1           | 1              | 0.99836        | 0.00196    | 0.00032        | 0.00032              | 0.58333           |
| Class: darkred          | 0           | 1           | NaN            | 0.99705        | 0.00294    | 0              | 0                    | 0.5               |
| Class:<br>darkturquoise | 0.11111     | 1           | 1              | 0.99737        | 0.00294    | 0.00032        | 0.00032              | 0.55555           |
| Class: green            | 0.79149     | 0.97693     | 0.74104        | 0.98251        | 0.07697    | 0.06092        | 0.08221              | 0.88421           |
| Class:<br>greenyellow   | 0.5         | 0.993322    | 0.591837       | 0.99034        | 0.01899    | 0.00949        | 0.01605              | 0.74666           |
| Class: grey             | 0.72606     | 0.92678     | 0.58209        | 0.96014        | 0.12316    | 0.08942        | 0.15362              | 0.82642           |
| Class: grey60           | 0.3         | 1           | 1              | 0.99310        | 0.00982    | 0.00294        | 0.00294              | 0.65              |
| Class: lightcyan        | 0.45945     | 0.999005    | 0.85           | 0.99340        | 0.01211    | 0.00556        | 0.00655              | 0.72923           |
| Class: lightgreen       | 0.27272     | 0.99934     | 0.75           | 0.99474        | 0.00720    | 0.00196        | 0.00262              | 0.63603           |
| Class:<br>lightyellow   | 0.45454     | 0.99967     | 0.909091       | 0.99605        | 0.00720    | 0.00327        | 0.00360              | 0.72710           |
| Class: magenta          | 0.59551     | 0.98718     | 0.58242        | 0.98785        | 0.02915    | 0.01736        | 0.02981              | 0.79134           |
| Class:<br>midnightblue  | 0.39130     | 0.996009    | 0.6            | 0.99073        | 0.015067   | 0.005896       | 0.009826             | 0.69365           |
| Class: orange           | 0.16666     | 1           | 1              | 0.99836        | 0.001965   | 0.000327       | 0.000327             | 0.58333           |
| Class: pink             | 0.77143     | 0.97749     | 0.71681        | 0.98302        | 0.06878    | 0.05306        | 0.07403              | 0.87446           |
| Class: purple           | 0.52703     | 0.99362     | 0.67241        | 0.98831        | 0.02424    | 0.01277        | 0.019                | 0.76032           |
| Class: red              | 0.75983     | 0.97557     | 0.71605        | 0.98043        | 0.07501    | 0.05699        | 0.07959              | 0.8677            |
| Class: royalblue        | 0.3         | 0.9996714   | 0.75           | 0.9977042      | 0.0032755  | 0.0009826      | 0.0013102            | 0.6498357         |
| Class: salmon           | 0.382979    | 0.997339    | 0.692308       | 0.99042        | 0.015395   | 0.005896       | 0.008516             | 0.690159          |

|                  |           |          |          |           |           |           |           |           |
|------------------|-----------|----------|----------|-----------|-----------|-----------|-----------|-----------|
| Class: tan       | 0.362069  | 0.995993 | 0.636364 | 0.987748  | 0.018998  | 0.006878  | 0.010809  | 0.679031  |
| Class: turquoise | 0.8048    | 0.97169  | 0.77681  | 0.976     | 0.10907   | 0.08778   | 0.113     | 0.88825   |
| Class: white     | 0.1666667 | 1        | 1        | 0.9983617 | 0.0019653 | 0.0003275 | 0.0003275 | 0.5833333 |
| Class: yellow    | 0.73818   | 0.97264  | 0.7276   | 0.97404   | 0.09008   | 0.06649   | 0.09139   | 0.85541   |

---

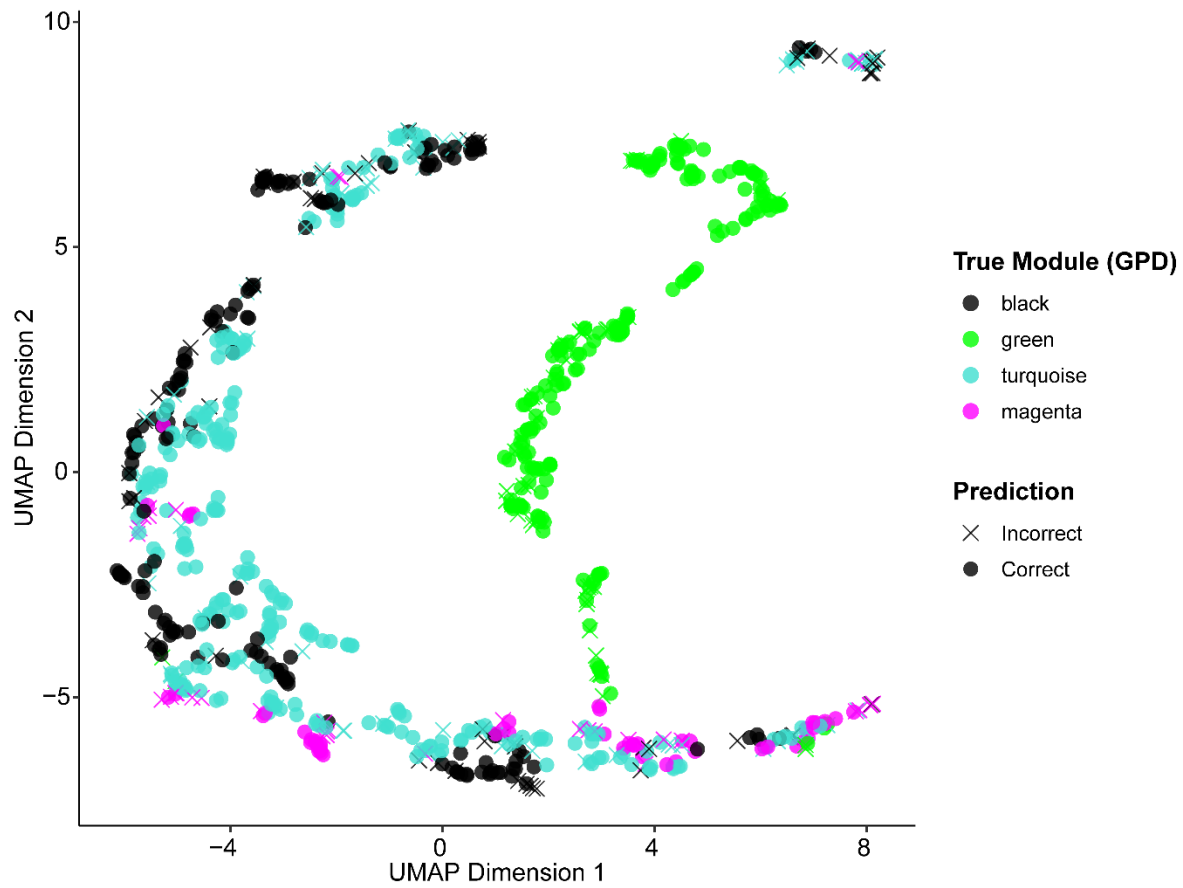

**Figure S20.** Two-dimensional UMAP projection of test genes belonging to the four *GPD*-associated modules (black, green, turquoise, and magenta). Points are colored by true module identity, and classification correctness is indicated by shape (cross = misclassified; circle = correct). UMAP was performed using `n_neighbors = 5` and default settings for other parameters.

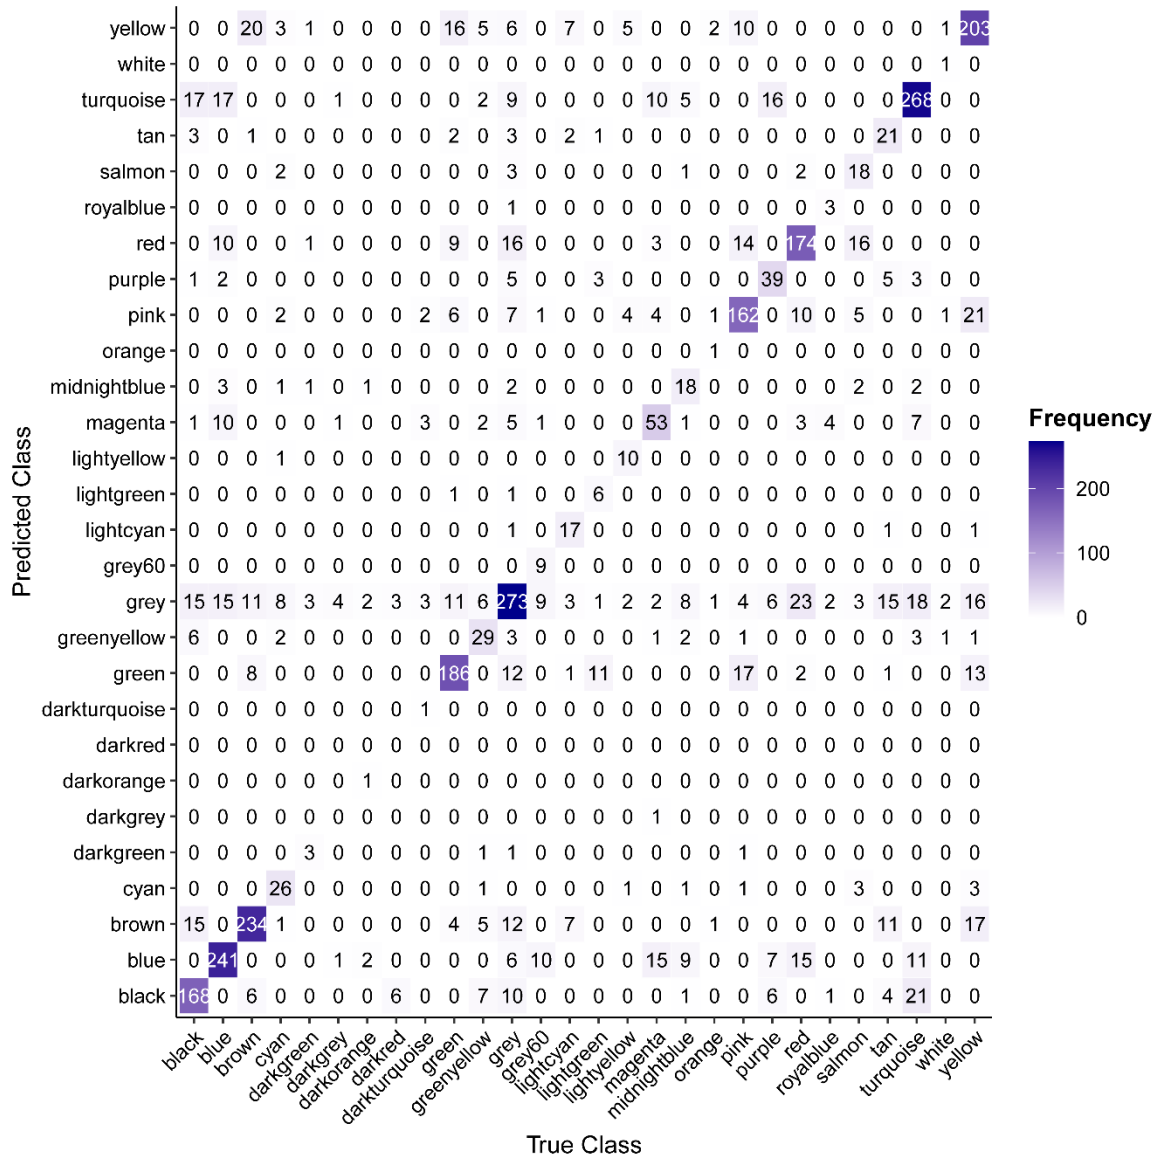

**Figure S21.** Confusion matrix showing classification performance of the Random Forest model across all 28 co-expression modules. The matrix compares true module labels (x-axis) with predicted labels (y-axis) for 3,053 test genes. The diagonal dominance reflects high agreement between predictions and true classes, particularly in modules with higher prevalence (e.g., turquoise, green, grey).
